# Supplementary material for: Facile hydrothermal synthesis and pulsed laser deposition of Ca0.5Y1−x(WO4)2:xEu3+ phosphors: investigations on the luminescence, Judd–Ofelt analysis and charge compensation mechanism
Source: Royal Society of Chemistry journal article supplement (doi:10.1039/c6nj02975b), 2016-11-24
Supplement: c6nj02975b1.pdf [file c6nj02975b1.pdf]

# Electronic Supporting Information (ESI)

## Facile Hydrothermal Synthesis and Pulsed Laser Deposition of $\text{Ca}_{0.5}\text{Y}_{1-x}(\text{WO}_4)_2:x\text{Eu}^{3+}$ phosphor : Investigations on the Luminescence, Judd-Ofelt analysis and Charge Compensation Mechanism

Venkatakrisnan Mahalingam<sup>a</sup>, Jagannathan Thirumalai<sup>a,\*</sup>

<sup>a</sup>Department of Physics, B. S. Abdur Rahman University, Vandalur, Chennai - 600 048, Tamilnadu, India

(E-mail address: [jthirumalai@bsauniv.ac.in](mailto:jthirumalai@bsauniv.ac.in), [thirumalaijg@gmail.com](mailto:thirumalaijg@gmail.com); Phone: +91-(0)44-22751347-

350(4 lines), Fax: +91-44-22750520.)

## Contents

1. **Fig. S1.** Indexed XRD pattern of the  $\text{Ca}_{0.5}\text{Y}_{1-x}(\text{WO}_4)_2:\text{xEu}^{3+}$  phosphor using ammonium tungstate as one of the precursors.
2. **Fig. S2.** FESEM image of the  $\text{Ca}_{0.5}\text{Y}_{1-x}(\text{WO}_4)_2:\text{xEu}^{3+}$  phosphor at 24 h reaction time prepared without using the surfactant  $\text{Na}_2\text{EDTA}$ .
3. **Fig. S3.** FESEM image of the phosphor  $\text{Ca}_{0.5}\text{Y}_{1-x}(\text{WO}_4)_2:\text{xEu}^{3+}$  phosphor at 24 h reaction time showing particle size.
4. **Fig. S4.** XPS survey spectrum for  $\text{Ca}_{0.5}\text{Y}_{1-x}(\text{WO}_4)_2:\text{xEu}^{3+}$  phosphor.

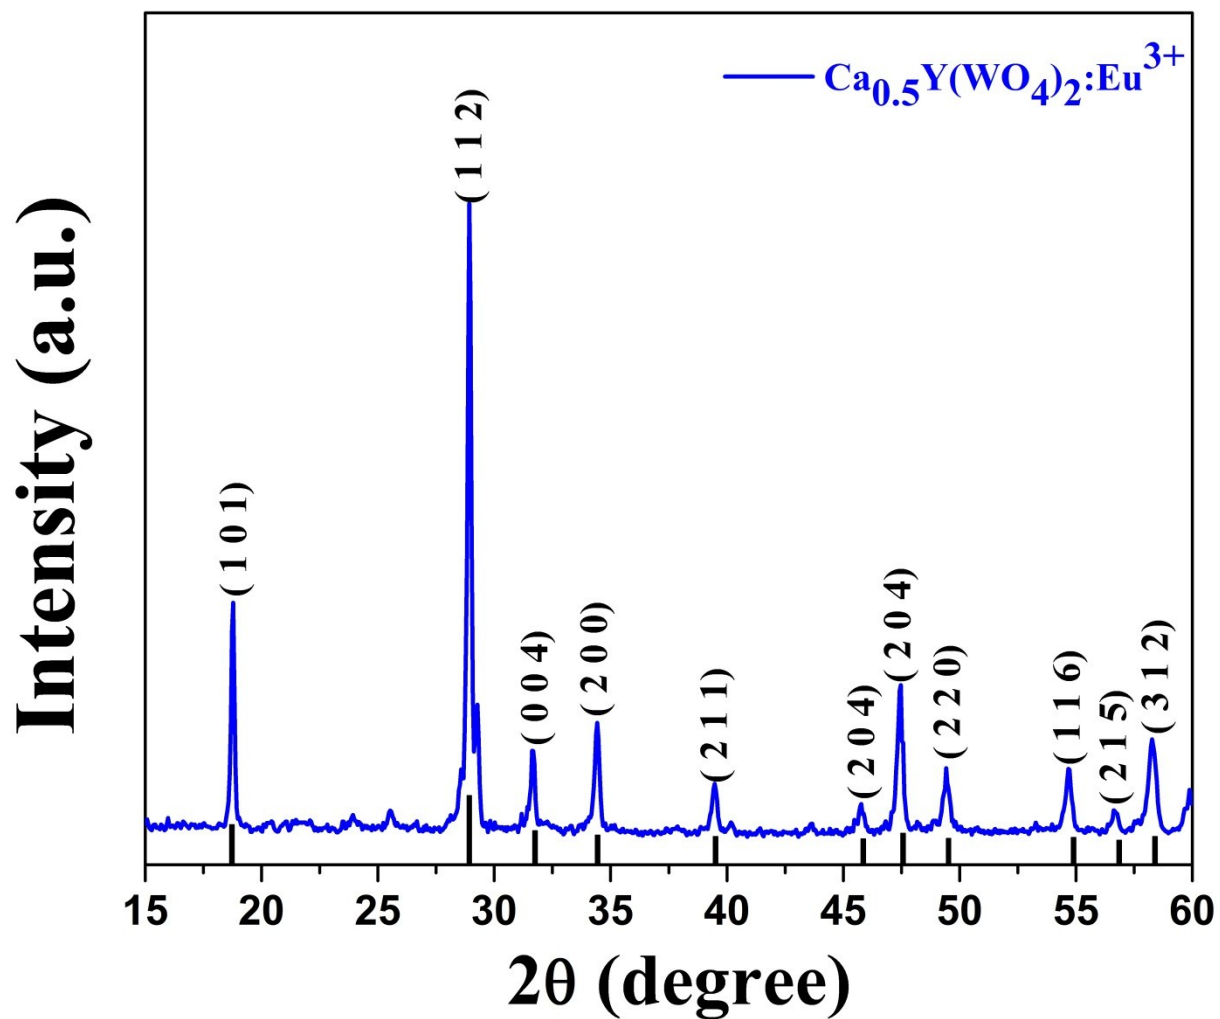

**Fig. S1.** Indexed XRD pattern of the  $\text{Ca}_{0.5}\text{Y}_{1-x}(\text{WO}_4)_2:x\text{Eu}^{3+}$  phosphor using ammonium tungstate as one of the precursors.

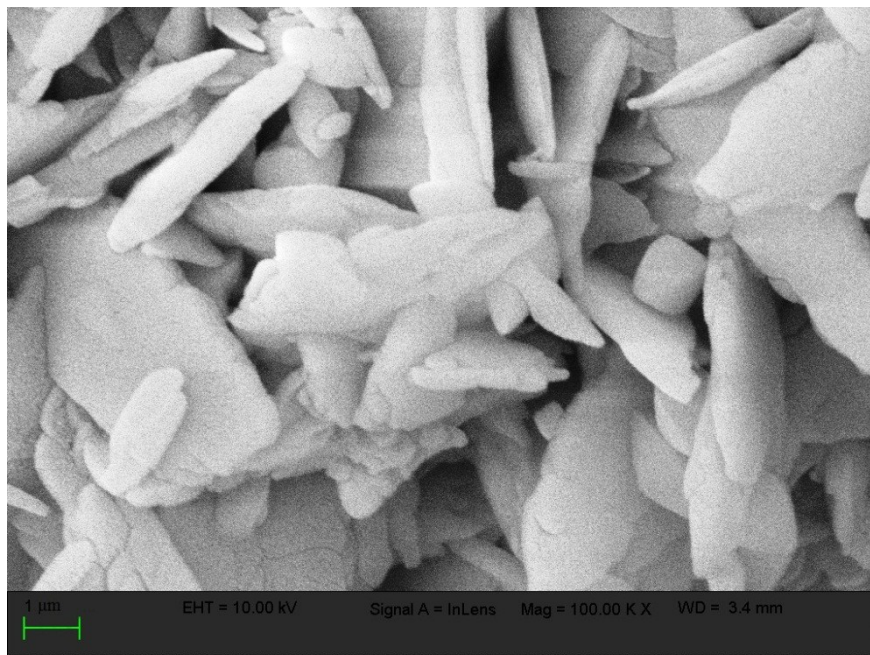

**Fig. S2.** FESEM image of the  $\text{Ca}_{0.5}\text{Y}_{1-x}(\text{WO}_4)_2:x\text{Eu}^{3+}$  phosphor at 24 h reaction time prepared without using the surfactant EDTA.

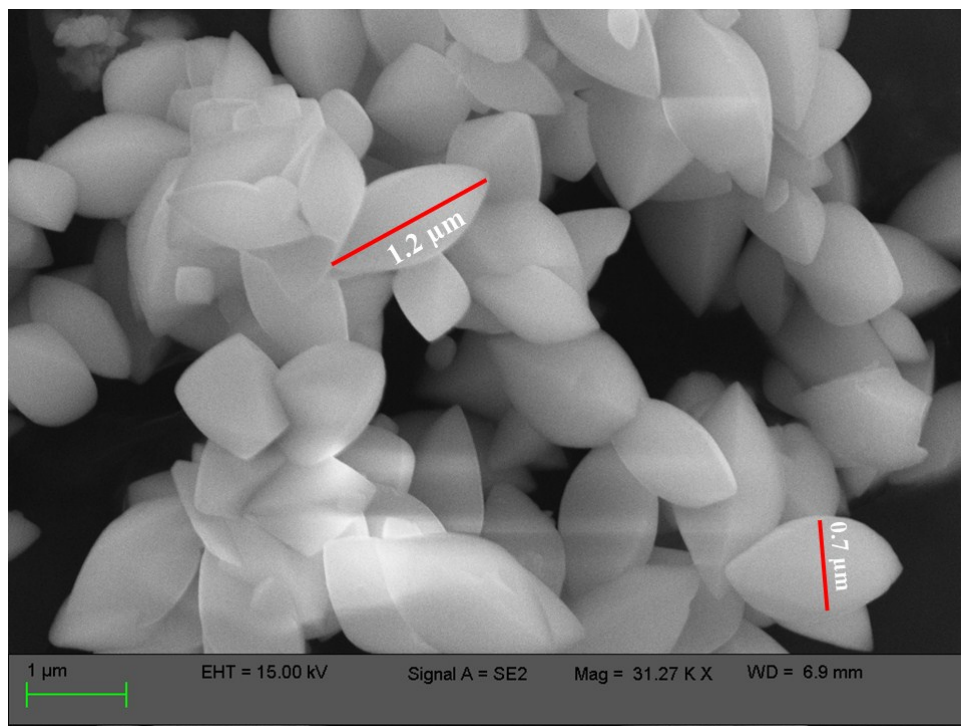

**Fig. S3.** FESEM image of the phosphor  $\text{Ca}_{0.5}\text{Y}_{1-x}(\text{WO}_4)_2:\text{xEu}^{3+}$  phosphor at 24 h reaction time showing particle size.

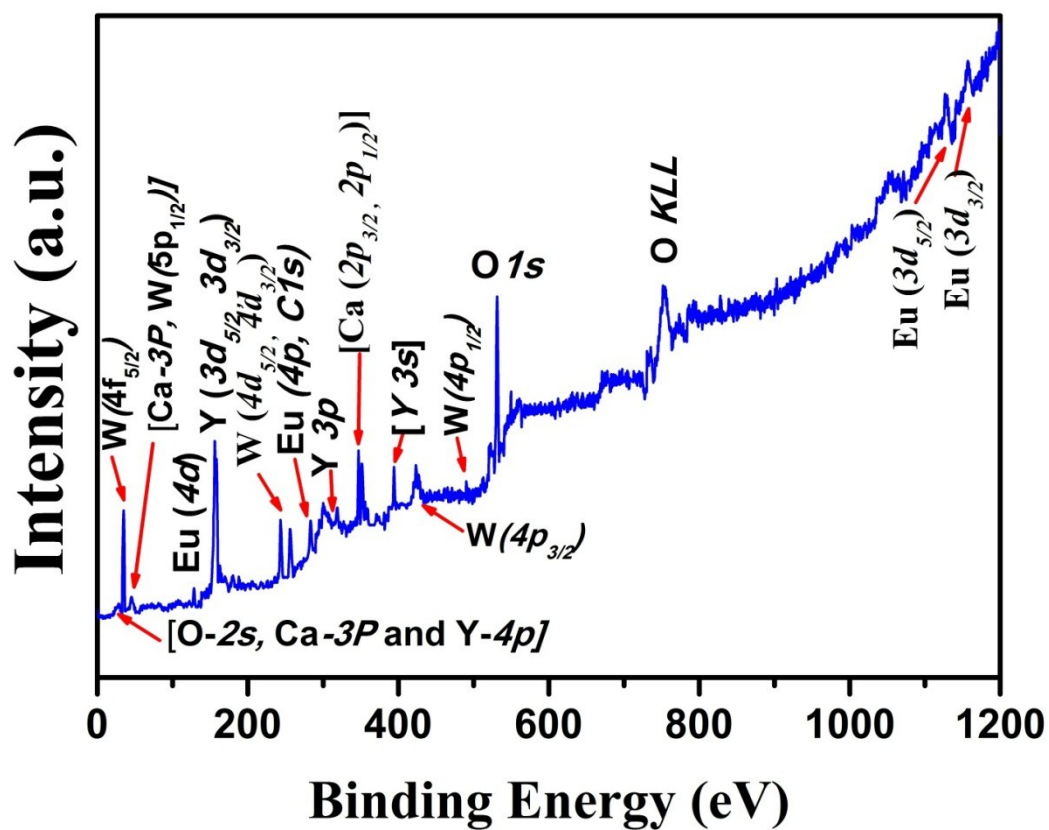

Fig. S4. XPS survey spectrum for  $\text{Ca}_{0.5}\text{Y}_{1-x}(\text{WO}_4)_2:\text{xEu}^{3+}$  phosphor.
